# Supplementary material for: Quantitative Analysis of Calcium Spikes in Noisy Fluorescent Background
Source: PubMed Central journal article supplement (PMC3669300; doi:10.1371/journal.pone.0064394), 2013-05-31
Supplement: pone.0064394.s001.pdf [file pone.0064394.s001.pdf]

# Quantitative analysis of calcium spikes in noisy fluorescent background

Radoslav Janicek<sup>1</sup>, Matej Hotka<sup>1,2</sup>, Alexandra Zahradníková, Jr.<sup>1</sup>, Alexandra Zahradníková<sup>1</sup>, and Ivan Zahradník<sup>1</sup>.

<sup>1</sup>Institute of Molecular Physiology and Genetics, Slovak Academy of Sciences, Vlárská 5, 833 34 Bratislava, Slovakia, <sup>2</sup>Department of Biophysics, Faculty of Natural Sciences, Pavol Jozef Šafárik University, Košice, Slovakia

## Supporting Tables

Table S1 The parameter values of simulated OG 5-N spikes.

| Parameters and descriptors  | Simulation 1<br>(mean $\pm$ S.D.)<br>N = 1000 | Simulation 2 | Reference<br>(mean $\pm$ S.D.)<br>N = 144 |
|-----------------------------|-----------------------------------------------|--------------|-------------------------------------------|
| $t_0$ (ms)                  | 4.39 $\pm$ 1.72                               | 4.13         | 4.13 $\pm$ 1.92                           |
| $F_M$                       | 1.58 $\pm$ 0.55                               | 1.577        | 1.577 $\pm$ 0.53                          |
| $\tau_A$ (ms)               | 3.10 $\pm$ 1.04                               | 3.13         | 3.13 $\pm$ 1.32                           |
| $\tau_I$ (ms)               | 5.50 $\pm$ 2.10                               | 5.48         | 5.48 $\pm$ 2.64                           |
| $\alpha$ (s <sup>-1</sup> ) | 3.75 $\pm$ 1.97                               | 3.70         | 3.70 $\pm$ 0.32                           |
| A                           | 0.82 $\pm$ 0.32                               | 0.81         | 0.77 $\pm$ 0.24                           |
| TTP (ms)                    | 11.28 $\pm$ 2.95                              | 11.29        | 10.80 $\pm$ 2.28                          |
| FDHM (ms)                   | 7.02 $\pm$ 1.98                               | 7.19         | 6.67 $\pm$ 2.04                           |
| SNR                         | 5.39 $\pm$ 2.11                               | 5.08         | 5.08 $\pm$ 1.68                           |

Simulation 1: The mean and standard deviation of parameters and descriptors in the test dataset of simulated spikes that mimicked experiments (see Reference values). The parameter values of Eq. 1 were normally distributed pseudorandom numbers, generated using the Mersenne twister algorithm [1] with Reference parameters (last column), and selected using the criteria  $t_0 \geq 0$ ,  $\tau_A > 1$  ms, and  $\tau_T > 1$  ms. The values of descriptors were determined from the simulated spikes numerically before addition of noise.

Simulation 2: The set of parameters and descriptors of the single simulated spike corresponded to the mean experimental estimate.

Reference: Experimental mean and standard deviations of parameters and descriptors of calcium spikes [2].

Table S2. The parameter values of simulated Fluo-3 spikes.

| Parameter                   | Simulation 1<br>(mean $\pm$ S.D.)<br>N = 1000 | Simulation 2 | Reference<br>(mean $\pm$ S.D.)<br>N = 118 |
|-----------------------------|-----------------------------------------------|--------------|-------------------------------------------|
| $t_0$ (ms)                  | 4.33 $\pm$ 1.56                               | 4.31         | 4.31 $\pm$ 1.63                           |
| $F_M$                       | 7.52 $\pm$ 2.74                               | 7.54         | 7.54 $\pm$ 2.72                           |
| $\tau_A$ (ms)               | 3.84 $\pm$ 1.37                               | 3.8          | 3.80 $\pm$ 1.96                           |
| $\tau_I$ (ms)               | 10.51 $\pm$ 3.56                              | 10.44        | 10.44 $\pm$ 3.80                          |
| $\alpha$ (s <sup>-1</sup> ) | 5.38 $\pm$ 1.64                               | 5.37         | 5.37 $\pm$ 0.15                           |
| A                           | 4.46 $\pm$ 1.76                               | 4.47         | 4.36 $\pm$ 1.30                           |
| TTP (ms)                    | 9.77 $\pm$ 2.89                               | 9.88         | 9.20 $\pm$ 3.15                           |
| FDHM (ms)                   | 18.30 $\pm$ 4.97                              | 18.07        | 17.63 $\pm$ 4.78                          |
| SNR                         | 14.19 $\pm$ 5.60                              | 13.86        | 13.86 $\pm$ 5.21                          |

Simulation 1: The mean and standard deviation of parameters and descriptors in the test dataset of simulated spikes that mimicked experiments (see Reference values). The parameter values of Eq. 1 were normally distributed pseudorandom numbers, generated using the Mersenne twister algorithm [1] with Reference parameters (last column), and selected using the criteria  $t_0 \geq 0$ ,  $\tau_A > 1$  ms, and  $\tau_T > 1$  ms. The values of descriptors were determined from the simulated spikes numerically before addition of noise.

Simulation 2: The set of parameters and descriptors of the single simulated spike corresponded to the mean experimental estimate.

Reference: Experimental mean and standard deviations of parameters and descriptors of calcium spikes [2].

Table S3. Ranking of the fitting algorithms according to the fraction of accepted fits.

| Rank | Constraints                 | Algorithm | Robust method | Fraction accepted [%] |             |              |
|------|-----------------------------|-----------|---------------|-----------------------|-------------|--------------|
|      |                             |           |               | Selection A           | Selection B | After F-test |
| 1    | yes                         | TR        | none          | 92.3                  | 99.3        | 95.1         |
| 2    | yes                         | Simplex   | n.a.          | 92.3                  | 99.3        | 95.1         |
| 3    | no                          | Simplex   | n.a.          | 89.2                  | 92.8        | 90.1         |
| 4    | yes                         | TR        | Bi            | 86.3                  | 99.3        | 89.2         |
| 5    | n.a.                        | LM        | none          | 84.3                  | 88          | 85.1         |
| 6    | n.a.                        | LM        | Bi            | 83.3                  | 87          | 81           |
| 7    | no                          | TR        | none          | 76.8                  | 79.3        | 77.5         |
| 8    | no                          | TR        | Bi            | 75.6                  | 77.6        | 73.4         |
| 9    | no                          | GN        | none          | 62.9                  | 65          | 62.7         |
| 10   | no                          | GN        | Bi            | 61.8                  | 62.7        | 59.8         |
| 11   | yes                         | TR        | LAR           | 88.8                  | 99          | 33.9         |
| 12   | n.a.                        | LM        | LAR           | 80.5                  | 86.1        | 29.4         |
| 13   | no                          | TR        | LAR           | 72.3                  | 76.3        | 26.8         |
| 14   | no                          | GN        | LAR           | 58.9                  | 61.3        | 22.4         |
|      | Original interactive method |           |               | 99.8                  | 99.2        | 95.0         |

TR – Trust Region; LM – Levenberg-Marquardt; GN – Gauss-Newton  
 Bi – Bisquare robust method; LAR – LAR robust method; n.a. – not applicable

Selection A: spike parameters satisfying conditions:  $\tau_A > 1.000001$ ,  $\tau_T > 1.000001$ ,  $FDHM < 40$ ,  $t_0 > 0$ ,  $t_0 < 80$ ,  $A \geq 0.01$

Selection B: fitted amplitude  $A > SNR$

Original interactive method – LM algorithm in Origin

Table S4. **Ranking of the fitting algorithms according to correlation between the simulated and fitted parameters.**

| Rank | Constraints     | Algorithm | Robust method | Pearson correlation coefficient |                |       |       |         |
|------|-----------------|-----------|---------------|---------------------------------|----------------|-------|-------|---------|
|      |                 |           |               | A                               | t <sub>0</sub> | TTP   | FDHM  | average |
| 1    | yes             | TR        | none          | 0.986                           | 0.893          | 0.869 | 0.942 | 0.923   |
| 2    | yes             | Simplex   | n.a.          | 0.986                           | 0.904          | 0.859 | 0.942 | 0.922   |
| 3    | yes             | TR        | Bi            | 0.985                           | 0.895          | 0.862 | 0.939 | 0.920   |
| 4    | no              | LM        | none          | 0.981                           | 0.891          | 0.855 | 0.929 | 0.914   |
| 5    | no              | Simplex   | n.a.          | 0.983                           | 0.895          | 0.838 | 0.925 | 0.910   |
| 6    | no              | LM        | Bi            | 0.978                           | 0.884          | 0.845 | 0.922 | 0.907   |
| 7    | no              | TR        | none          | 0.982                           | 0.874          | 0.841 | 0.927 | 0.906   |
| 8    | no              | TR        | Bi            | 0.979                           | 0.867          | 0.829 | 0.920 | 0.899   |
| 9    | no              | GN        | Bi            | 0.983                           | 0.876          | 0.821 | 0.911 | 0.898   |
| 10   | no              | GN        | none          | 0.979                           | 0.876          | 0.795 | 0.893 | 0.885   |
| 11   | yes             | TR        | LAR           | 0.924                           | 0.798          | 0.775 | 0.887 | 0.846   |
| 12   | no              | GN        | LAR           | 0.935                           | 0.794          | 0.737 | 0.845 | 0.828   |
| 13   | no              | LM        | LAR           | 0.907                           | 0.792          | 0.749 | 0.851 | 0.825   |
| 14   | no              | TR        | LAR           | 0.914                           | 0.770          | 0.728 | 0.843 | 0.813   |
|      | Original method |           |               | 0.982                           | 0.899          | 0.840 | 0.931 | 0.913   |

TR – Trust Region; LM – Levenberg-Marquardt; GN – Gauss-Newton

Bi – Bisquare robust method; LAR – LAR robust method; None – no robust method; n.a. – not applicable

The highest correlation coefficients are shown in bold; the lowest correlation coefficients are shown in italics.

**Table S5. Ranking of the fitting algorithms according to the fraction of outliers.**

| Rank | Constraints | Algorithm | Robust method | N   | Fraction of outliers [%] |
|------|-------------|-----------|---------------|-----|--------------------------|
| 1    | no          | TR        | none          | 775 | 0.52                     |
| 2    | yes         | TR        | Bi            | 892 | 0.56                     |
| 3    | no          | LM        | none          | 851 | 0.59                     |
| 4    | no          | TR        | Bi            | 734 | 0.68                     |
| 5    | no          | LM        | Bi            | 810 | 0.74                     |
| 6    | no          | Simplex   | n.a.          | 901 | 0.78                     |
| 7    | yes         | Simplex   | n.a.          | 951 | 0.84                     |
| 8    | yes         | TR        | none          | 951 | 0.84                     |
| 9    | yes         | TR        | LAR           | 339 | 0.88                     |
| 10   | no          | GN        | none          | 627 | 0.96                     |
| 11   | no          | GN        | Bi            | 598 | 1.00                     |
| 12   | no          | LM        | LAR           | 293 | 1.37                     |
| 13   | no          | TR        | LAR           | 267 | 1.50                     |
| 14   | no          | GN        | LAR           | 223 | 1.79                     |

N – the number of spikes that passed the F-test

TR – Trust Region; LM – Levenberg-Marquardt; GN – Gauss-Newton

Bi – Bisquare robust method; LAR – LAR robust method; None – no robust method; n.a. – not applicable

Table S6. Ranking of the fitting algorithms according to the fraction of false positive spikes.

| Rank | Constraints | Algorithm | Robust method | Number of false positives |             |             |              |
|------|-------------|-----------|---------------|---------------------------|-------------|-------------|--------------|
|      |             |           |               | All false positives       | Selection A | Selection B | After F-test |
| 1    | no          | GN        | LAR           | 59                        | 10          | 03          | 0            |
| 2    | no          | GN        | Bi            | 69                        | 17          | 05          | 0            |
| 3    | no          | LM        | LAR           | 145                       | 36          | 26          | 0            |
| 4    | no          | TR        | LAR           | 163                       | 31          | 18          | 0            |
| 5    | no          | GN        | none          | 173                       | 36          | 04          | 0            |
| 6    | no          | TR        | Bi            | 180                       | 38          | 13          | 0            |
| 7    | no          | LM        | Bi            | 204                       | 61          | 18          | 0            |
| 8    | no          | Simplex   | n.a.          | 257                       | 92          | 19          | 0            |
| 9    | no          | LM        | none          | 284                       | 88          | 21          | 0            |
| 10   | no          | TR        | none          | 312                       | 68          | 16          | 0            |
| 11   | yes         | Simplex   | n.a.          | 1000                      | 249         | 57          | 0            |
| 12   | yes         | TR        | Bi            | 1000                      | 289         | 147         | 0            |
| 13   | yes         | TR        | LAR           | 1000                      | 326         | 201         | 0            |
| 14   | yes         | TR        | none          | 1000                      | 596         | 104         | 0            |

Selection A: parameters of false positive spikes satisfying conditions:  $\tau_A > 1.000001$ ,  $\tau_T > 1.000001$ ,  $FDHM < 40$ ,  $t_0 > 0$ ,  $t_0 < 80$ ,  $A \geq 0.01$

Selection B: fitted amplitude of false positive spikes  $A > SNR$

The algorithms were ranked according to the number of fits that provided false-positive spikes

## REFERENCES

1. Matsumoto M, Nishimura T (1998) Mersenne twister: a 623-dimensionally equidistributed uniform pseudo-random number generator. TOMACS 8: 3-30.
2. Zahradnikova A, Jr., Polakova E, Zahradnik I, Zahradnikova A (2007) Kinetics of calcium spikes in rat cardiac myocytes. J Physiol 578: 677-691.
